# Supplementary material
Source: PubMed Central journal article supplement (PMC4788285)
Supplement: barc858415.ww1_default.pdf [file barc858415.ww1_default.pdf]

Selected neurological and autoimmune diagnoses and ICD-10 codes included in the analyses.

| <b>Neurological and autoimmune diagnoses</b>                                 | <b>ICD-10 codes</b> |
|------------------------------------------------------------------------------|---------------------|
| Gullain-Barré Syndrome (GBS)                                                 | G61                 |
| Multiple sclerosis (MS) (demyelinating dis.)                                 | G35 (G36.0+ G37.9)  |
| Bell´s paralysis                                                             | G51                 |
| Narcolepsy                                                                   | G47.4               |
| Polyneuropathy unspecified                                                   | G62.9               |
| An/hypoesthesia                                                              | R20.0+R20.1         |
| Paraesthesia                                                                 | R20.2               |
| Rheumatological disease (RA)                                                 | M05-M06+M08         |
| Inflammatory Bowel Disease (IBD)<br>(Crohn´s disease and Ulcerative colitis) | K50-K51             |
| Insulin-dependent diabetes among<br>individuals born 1990 and later          | E10                 |
